# Supplementary material for: A Single Aptamer-Dependent Sandwich-Type Biosensor for the Colorimetric Detection of Cancer Cells via Direct Coordinately Binding of Bare Bimetallic Metal–Organic Framework-Based Nanozymes
Source: MDPI journal article supplement (doi:10.3390/bios13020225), 2023-02-03
Supplement: s1 [file s1]

# **A Single Aptamer-Dependent Sandwich-Type Biosensor for the Colorimetric Detection of Cancer Cells *Via* Direct Coordinately Binding of Bare Bimetallic Metal–Organic Framework-based Nanozymes**

Yuhui Zhu,<sup>a,†</sup> Xueting Fang,<sup>a,†</sup> Xiaofei Lv,<sup>a</sup> Meijun Lu,<sup>a</sup> Hui Xu,<sup>b</sup> Shengqiang Hu,<sup>a</sup> Shulin Zhao and Fanggui Ye<sup>a\*</sup>

<sup>a</sup> State Key Laboratory for the Chemistry and Molecular Engineering of Medicinal Resources, School of Chemistry and Pharmaceutical Sciences, Guangxi Normal University, Guilin 541004, P. R. China

<sup>b</sup> Nanxian Inspection and Testing Center of Yiyang City in Hunan Province, Yiyang 413299, China

\* Correspondence: fangguiye@163.com (F.Y.)

† Y.Z. and X.F. contributed equally to this work.

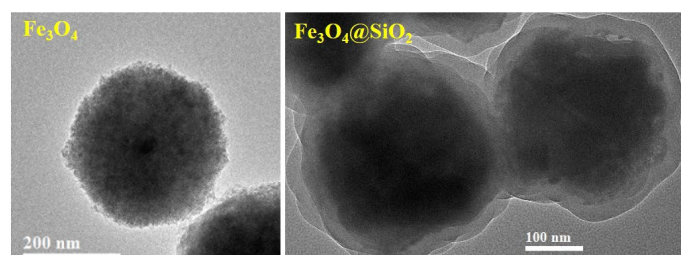

Figure S1. TEM images of  $\text{Fe}_3\text{O}_4$  and  $\text{Fe}_3\text{O}_4@\text{SiO}_2$ .

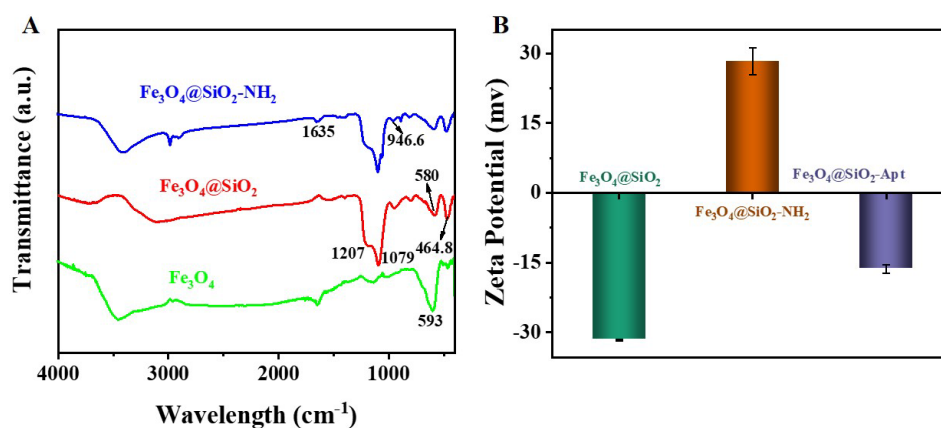

Figure S2. (A) FT-IR spectra of  $\text{Fe}_3\text{O}_4$ ,  $\text{Fe}_3\text{O}_4@\text{SiO}_2$ ,  $\text{Fe}_3\text{O}_4@\text{SiO}_2\text{-NH}_2$ . (B) Zeta potential of  $\text{Fe}_3\text{O}_4$ ,  $\text{Fe}_3\text{O}_4@\text{SiO}_2$ ,  $\text{Fe}_3\text{O}_4@\text{SiO}_2\text{-NH}_2$ .

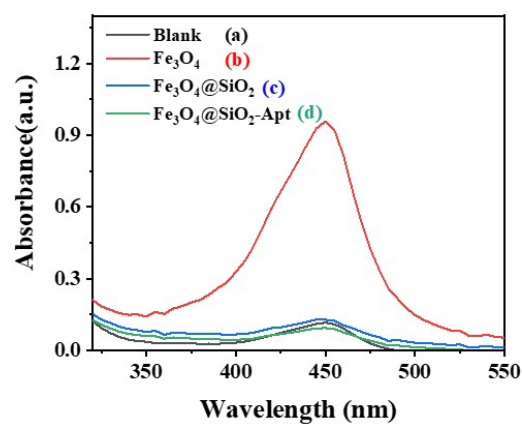

Figure S3. UV-vis absorbance spectra of the TMB- $\text{H}_2\text{O}_2$  system after different treatments.

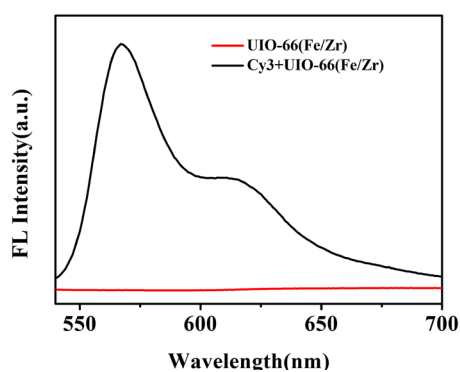

Figure S4. Fluorescence emission spectra of UIO-66(Fe/Zr) before and after incubation with Cy3 dyes.
